# Supplementary material for: An unusual nitroso⋯nitroso interaction in the coordination polymer structures of Ni(ii) and Co(ii) complexes with the α,ω-bis(benzotriazoloxy)alkane system
Source: Royal Society of Chemistry journal article supplement (doi:10.1039/c3ce41765d), 2013-10-09
Supplement: c3ce41765d.pdf [file c3ce41765d.pdf]

## Supporting information

### Unusual Nitroso···Nitroso Interaction in Coordination Polymer Structures of Ni(II) and Co(II) Complexes with $\alpha,\omega$ -bis(benzotriazoloxo)alkane System

Sandepta Saha<sup>a</sup>, Ashok Sasmal<sup>a</sup>, Guillaume Pilet<sup>b</sup>, Antonio Bauzá<sup>c</sup>, Antonio Frontera<sup>c</sup>,  
Samiran Mitra<sup>a\*</sup>

**Powder X-ray diffraction data were collected by Bruker D8 ADVANCE**

**Simulated and Powder X-ray diffraction patterns of the complex 1, 2 and 3**

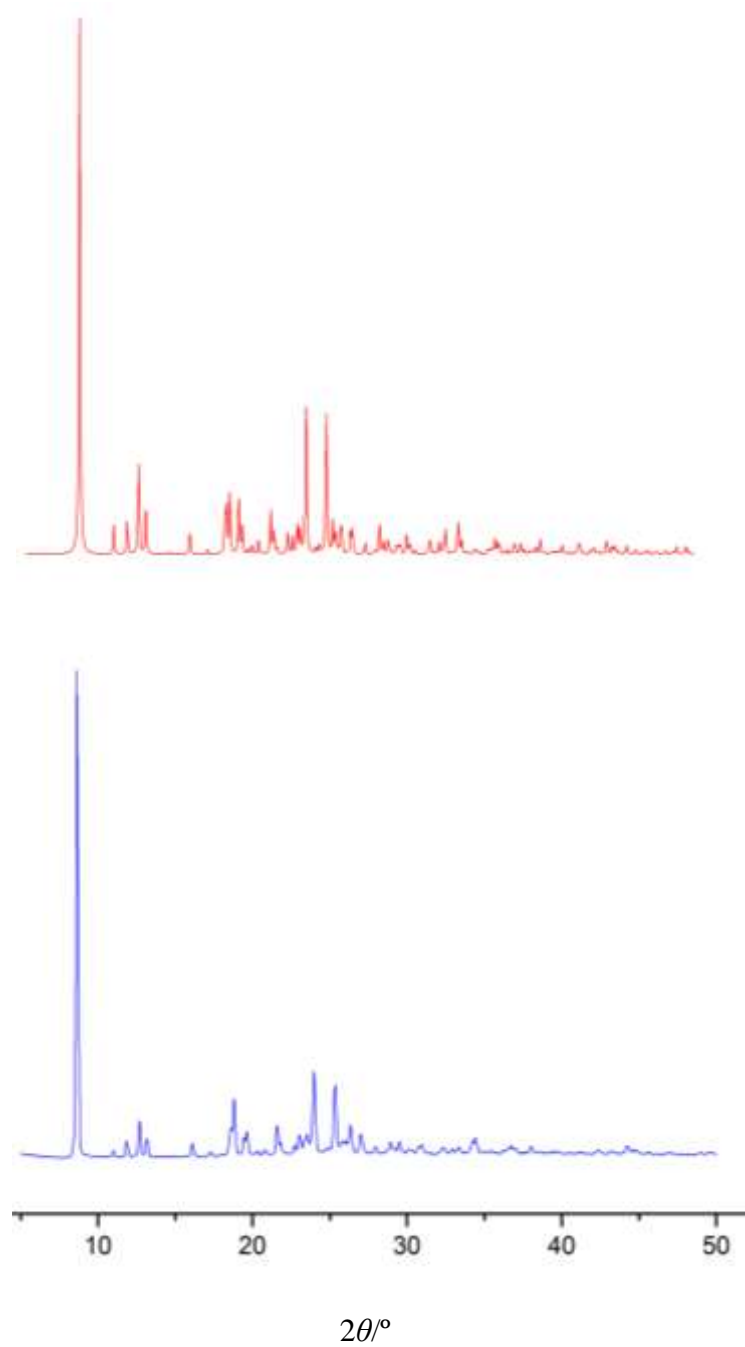

Figure S1: Simulated (Red) and powder X-ray diffraction patterns (Blue) of **1**

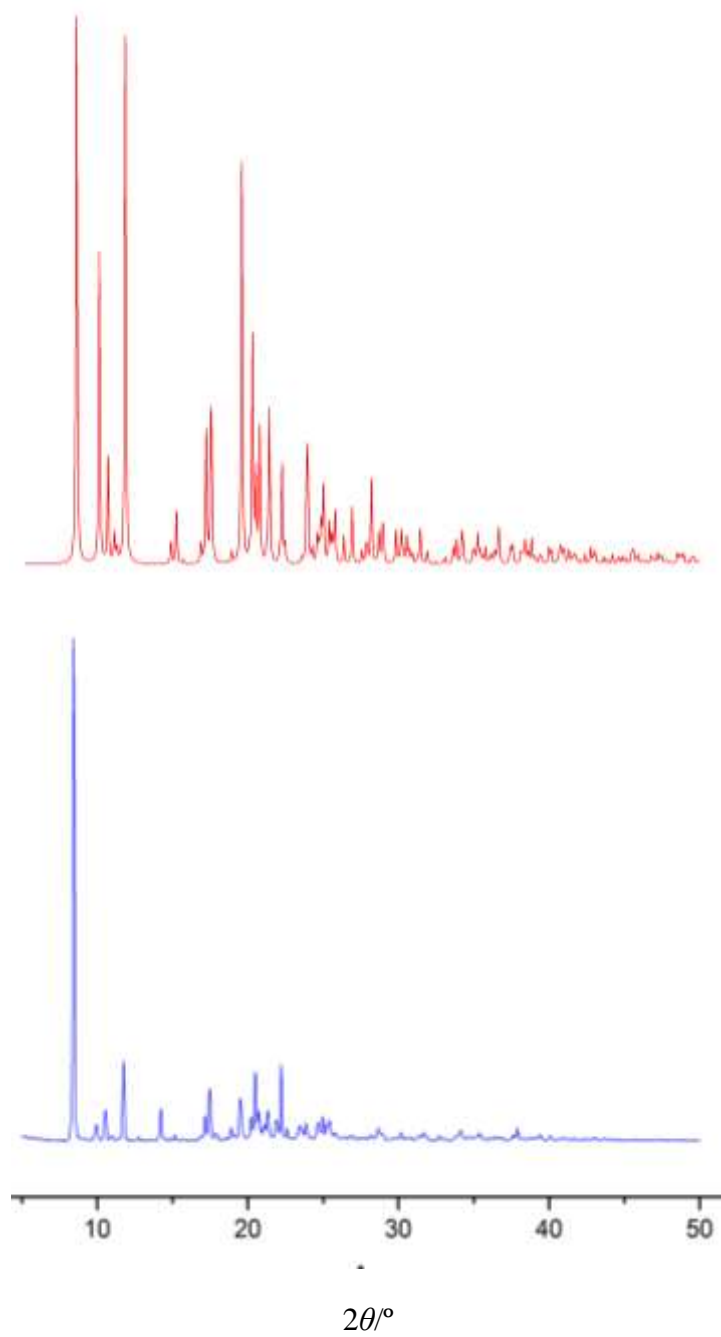

Figure S2: Simulated (Red) and powder X-ray diffraction patterns (Blue) of **2**

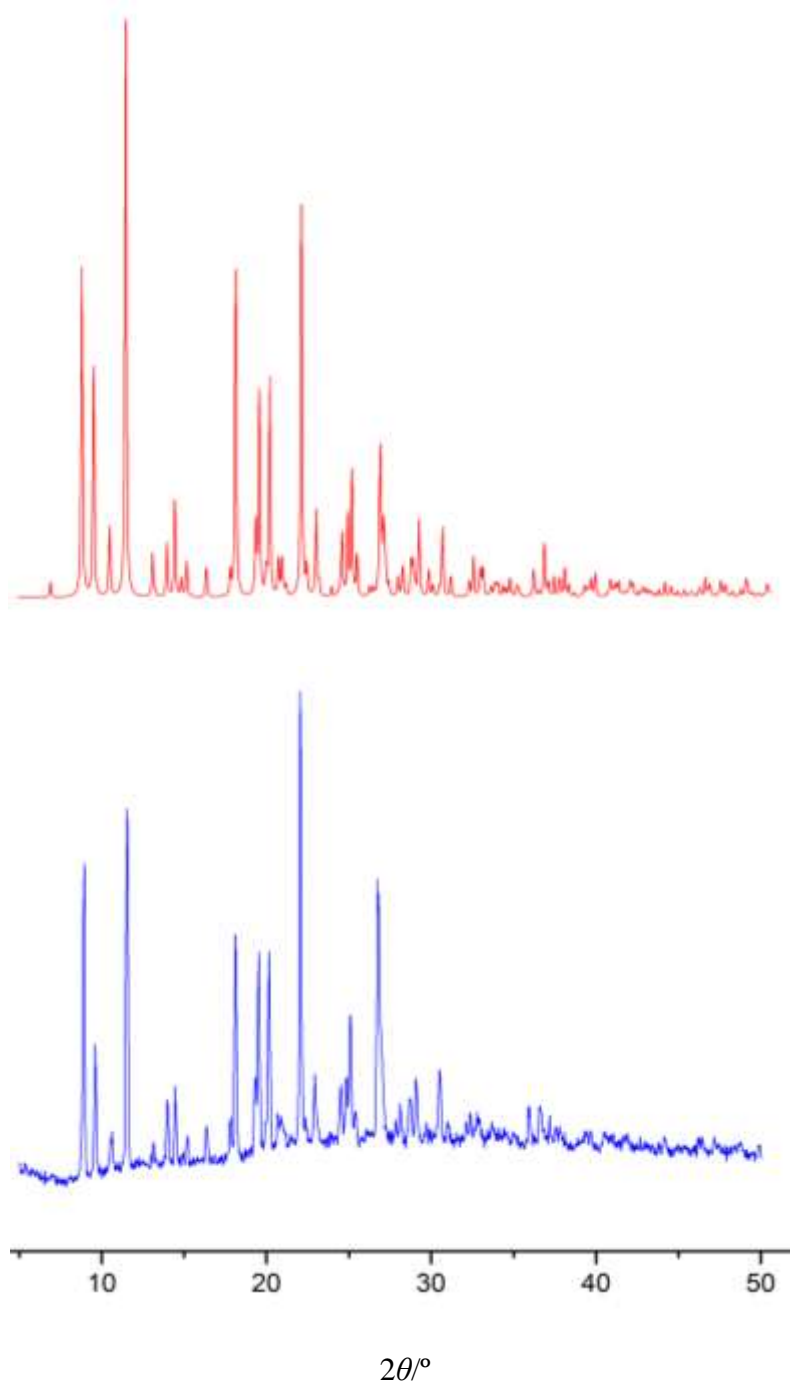

Figure S3: Simulated (Red) and powder X-ray diffraction patterns (Blue) of **3**
